# Supplementary material for: Spatial heterogeneity of tumor microenvironment influences the prognosis of clear cell renal cell carcinoma
Source: PubMed Central journal article supplement (PMC10360235; doi:10.1186/s12967-023-04336-8), 2023-07-20
Supplement: 12967_2023_4336_MOESM4_ESM.pdf [file 12967_2023_4336_MOESM4_ESM.pdf]

**A**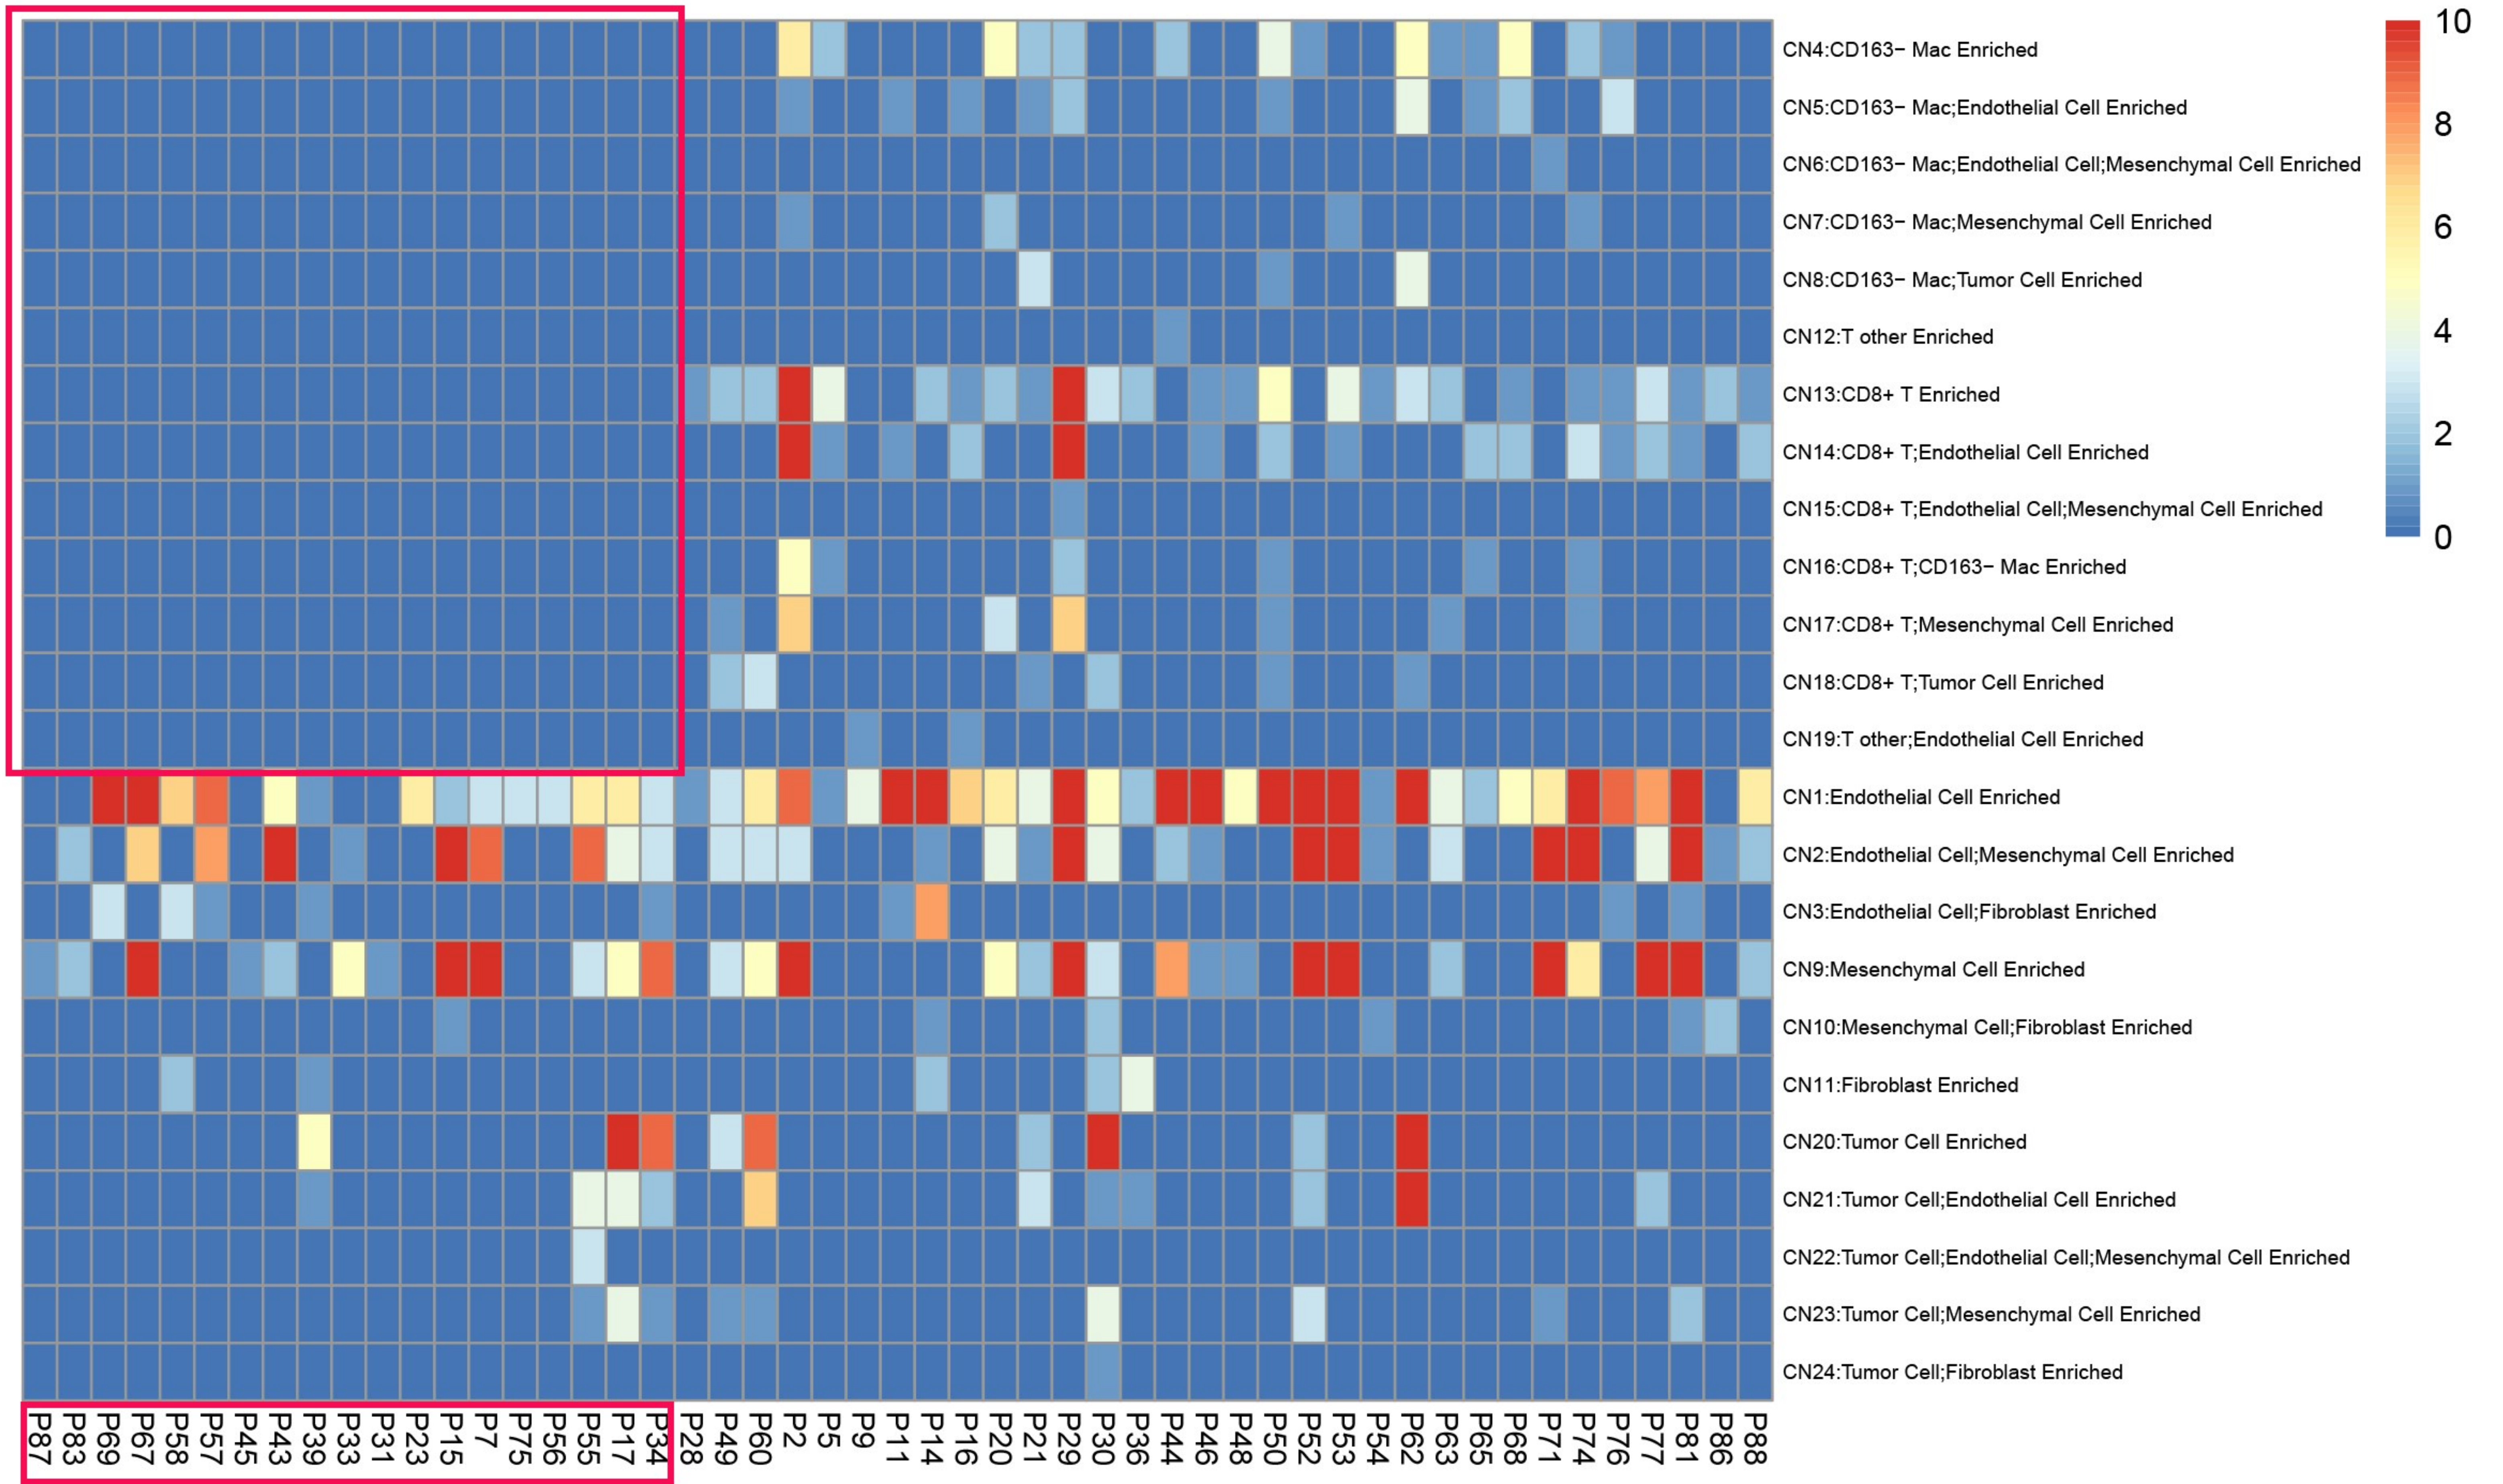**B**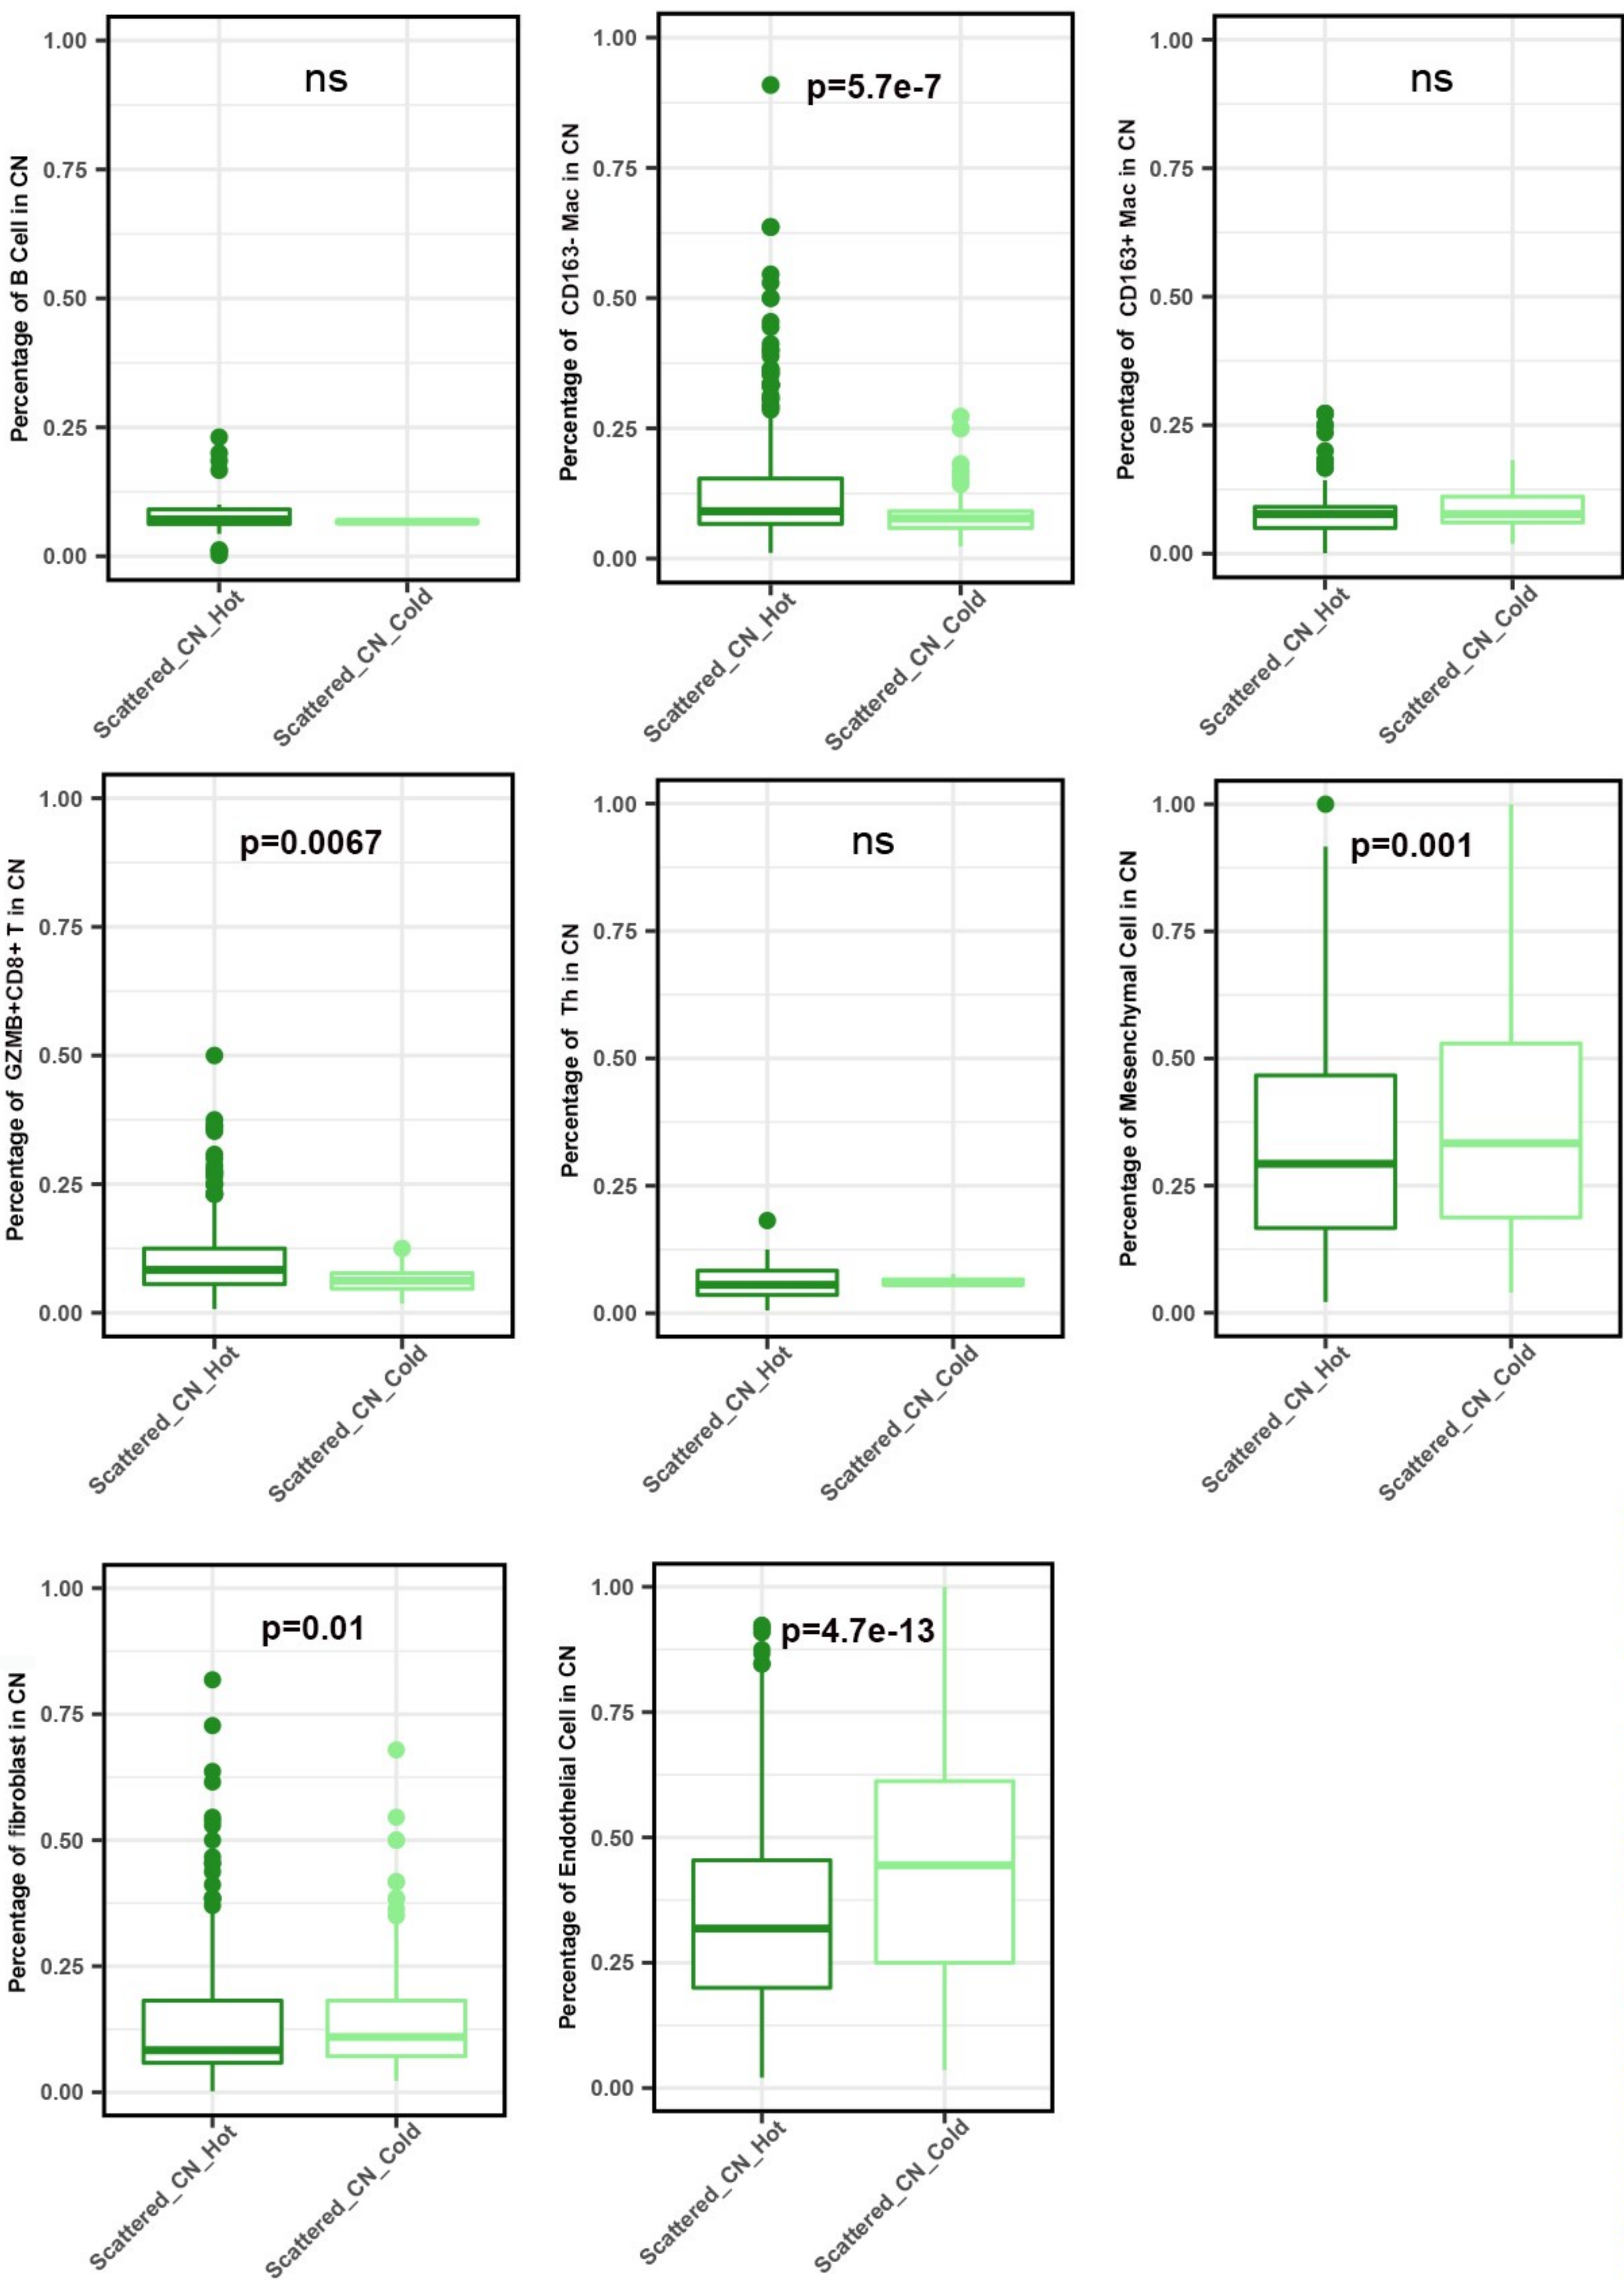**C****Scattered-CN-Cold**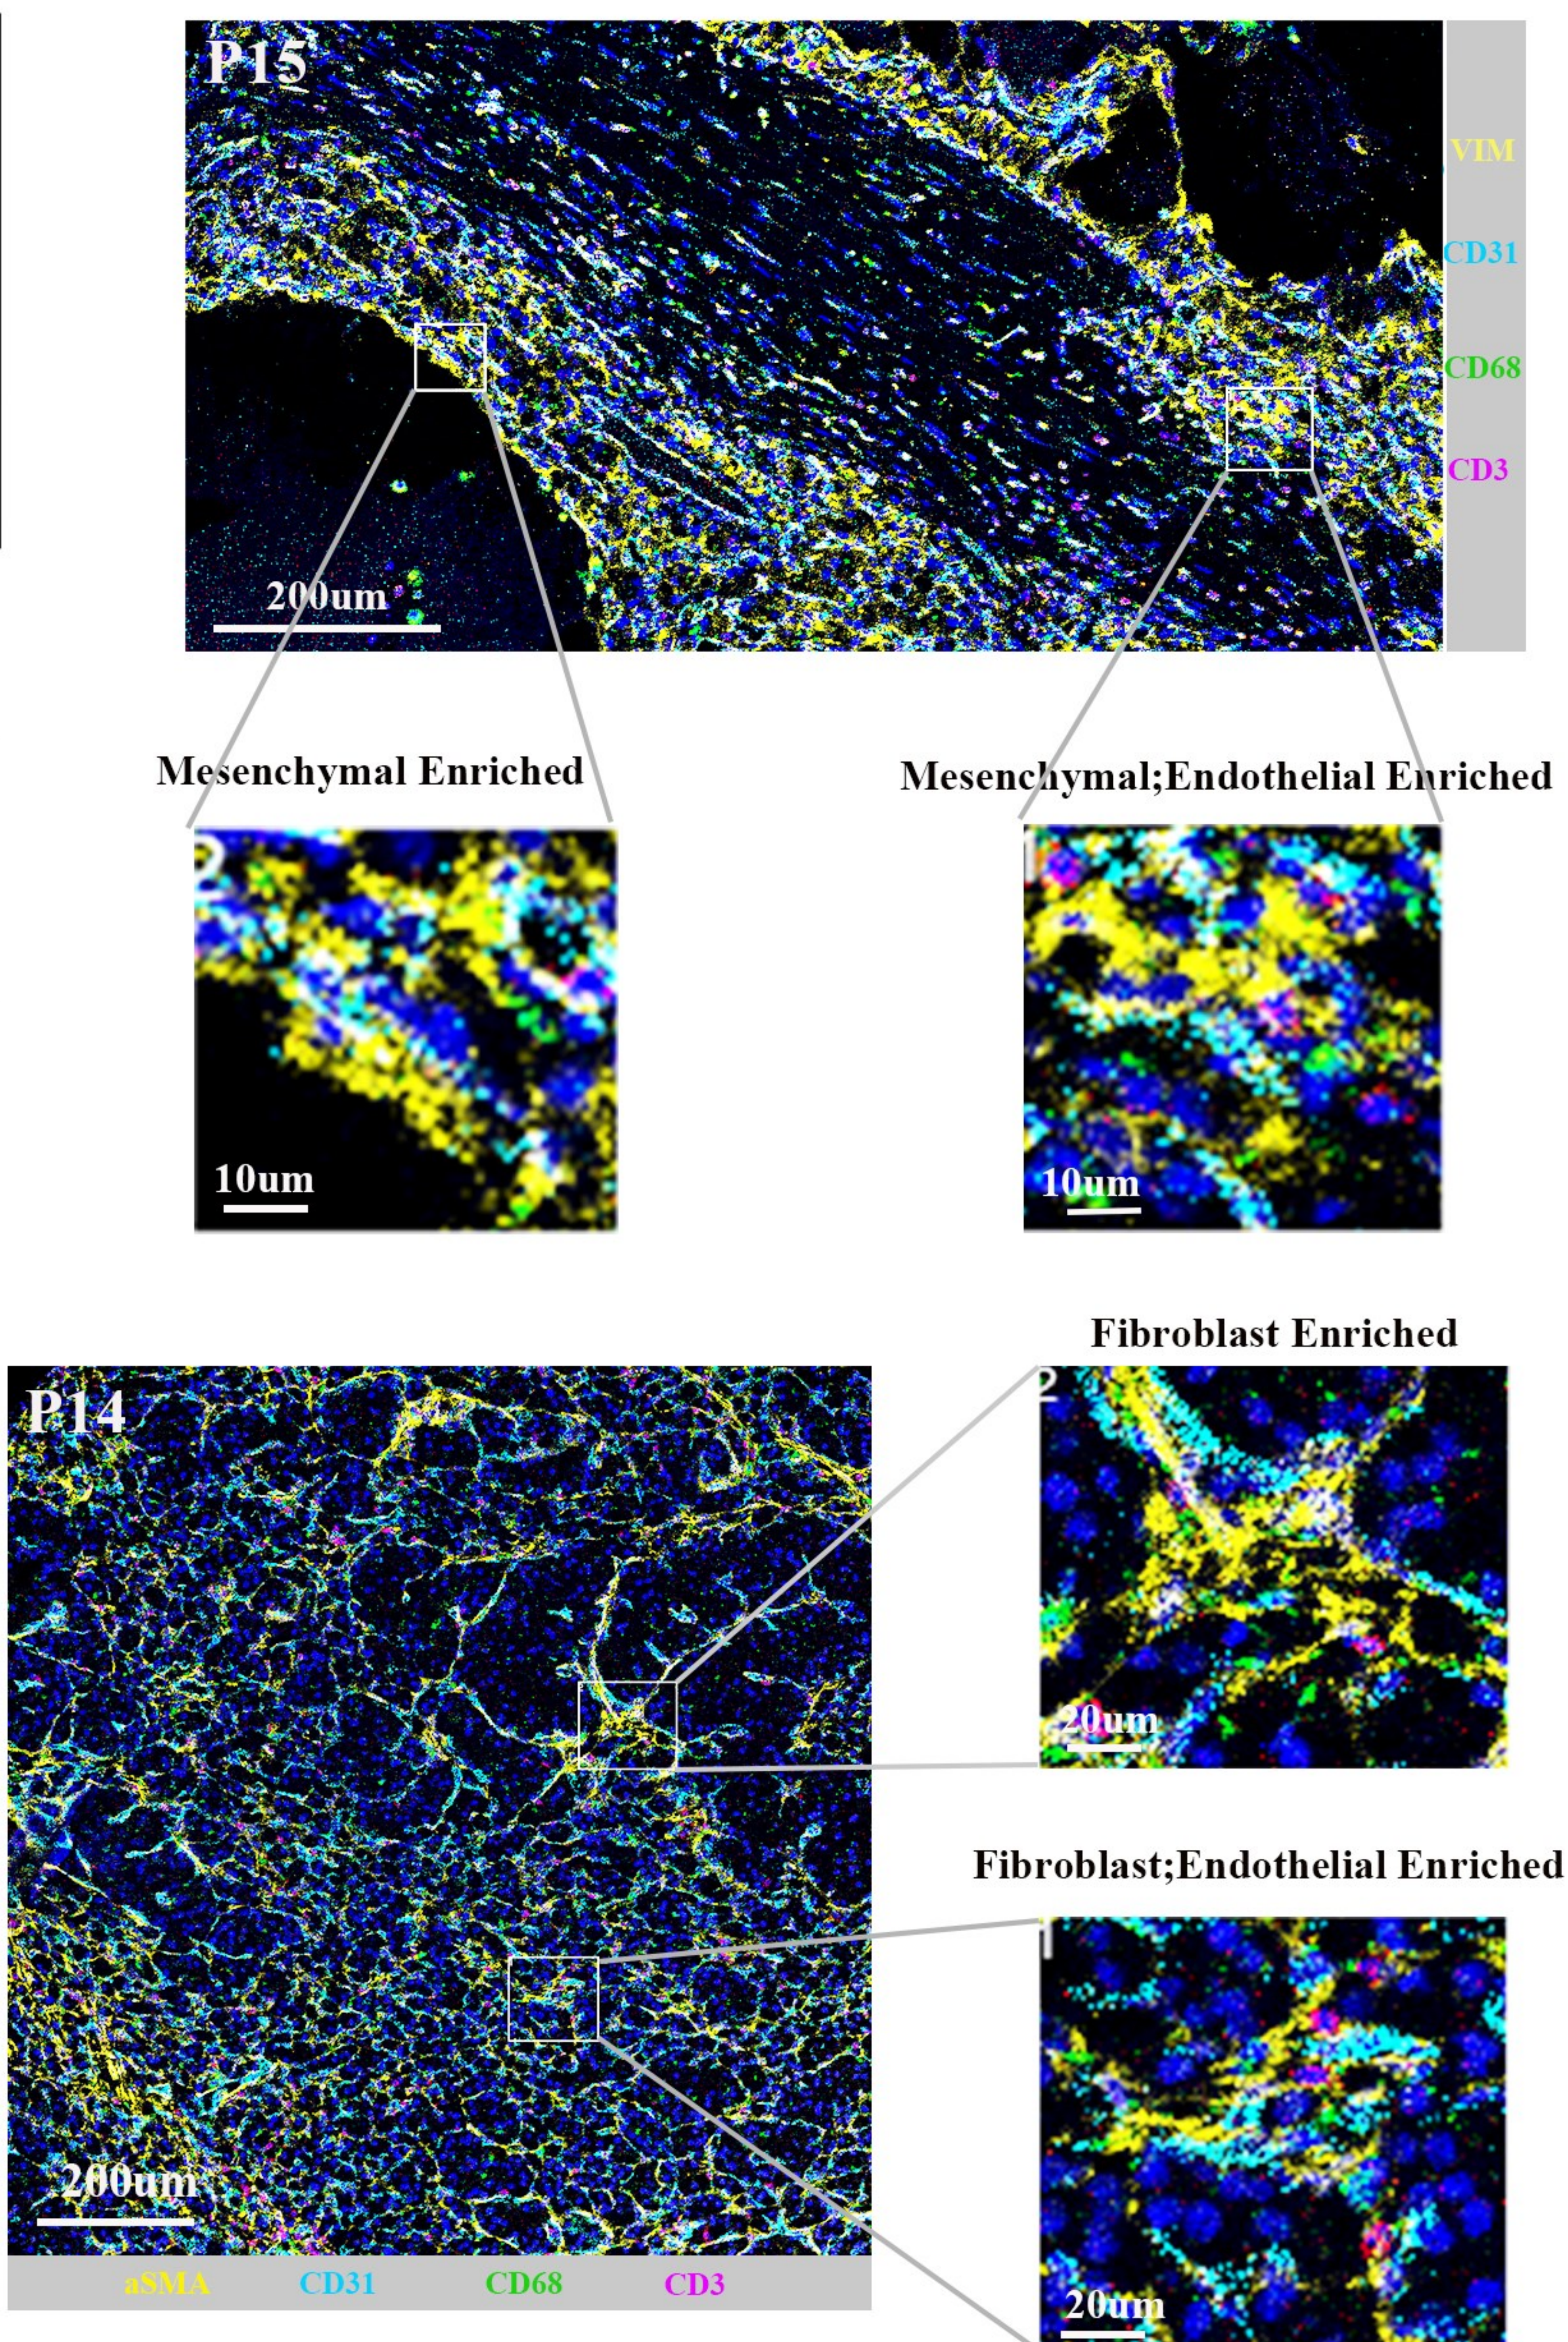**Figure S4**
